# Supplementary material for: Active performance of tetrahedral groups to SHG response: theoretical interpretations of Ge/Si-containing borate crystals
Source: Royal Society of Chemistry journal article supplement (doi:10.1039/c5cp07313h), 2016-01-01
Supplement: c5cp07313h1.pdf [file c5cp07313h1.pdf]

## Active Performance of Tetrahedral Groups to SHG Response: the Theoretical Interpretations of Ge/Si-Containing Borate crystals

Linping Li,<sup>a,b</sup> Zihua Yang,<sup>b</sup> Bing-Hua Lei,<sup>b</sup> Qingrong Kong,<sup>b</sup> Ming-Hsein Lee,<sup>c</sup> Bingbing Zhang,<sup>b</sup> Shilie Pan,<sup>b</sup> Jun Zhang\*<sup>a</sup>

<sup>a</sup> School of Physics Science and Technology, Xinjiang University, Urumqi 830046, China;

<sup>b</sup> Xinjiang Technical Institute of Physics & Chemistry, Chinese Academy of Sciences, 40-1 South Beijing Road Urumqi 830011, China;

<sup>c</sup> Department of Physics, Tamkang University, Taipei 25137, Taiwan

†Corresponding Author, email:

zhj@xju.edu.cn.

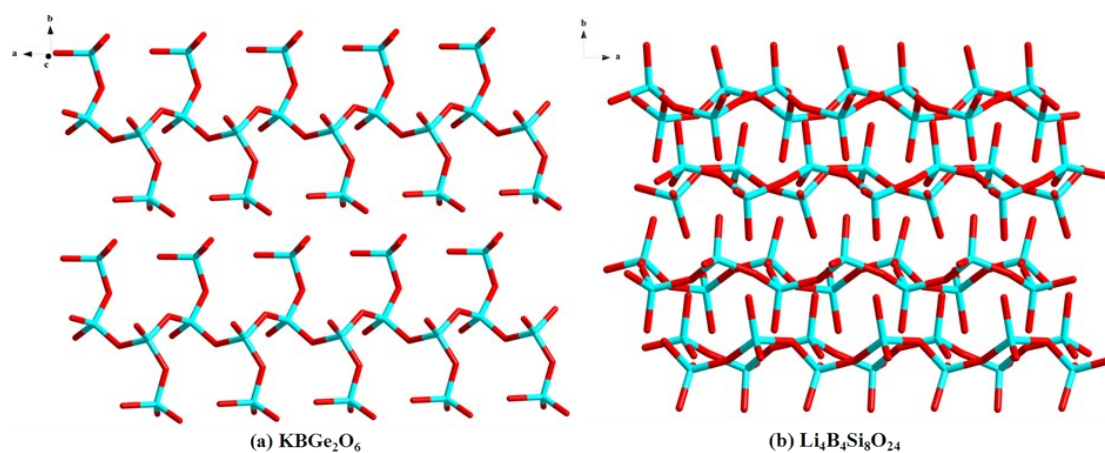

Figure S1. Different R-O patterns of (a)  $\text{KGe}_2\text{O}_6$  and (b)  $\text{Li}_4\text{B}_4\text{Si}_8\text{O}_{24}$ .

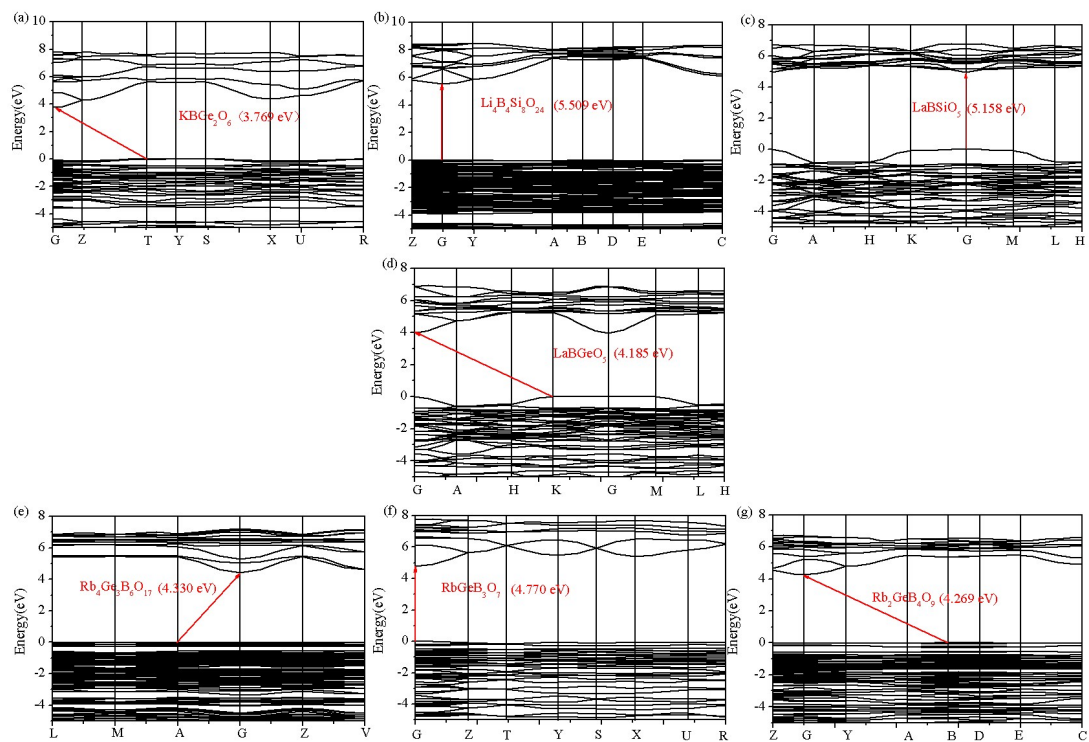

Figure S2. Band structures of  $\text{KBGe}_2\text{O}_6$ ,  $\text{Li}_4\text{B}_4\text{Si}_8\text{O}_{24}$ ,  $\text{LaBSiO}_5$ ,  $\text{LaBGeO}_5$ ,  $\text{Rb}_4\text{Ge}_3\text{B}_6\text{O}_{17}$ ,  $\text{RbGeB}_3\text{O}_7$  and  $\text{Rb}_2\text{GeB}_4\text{O}_9$ .

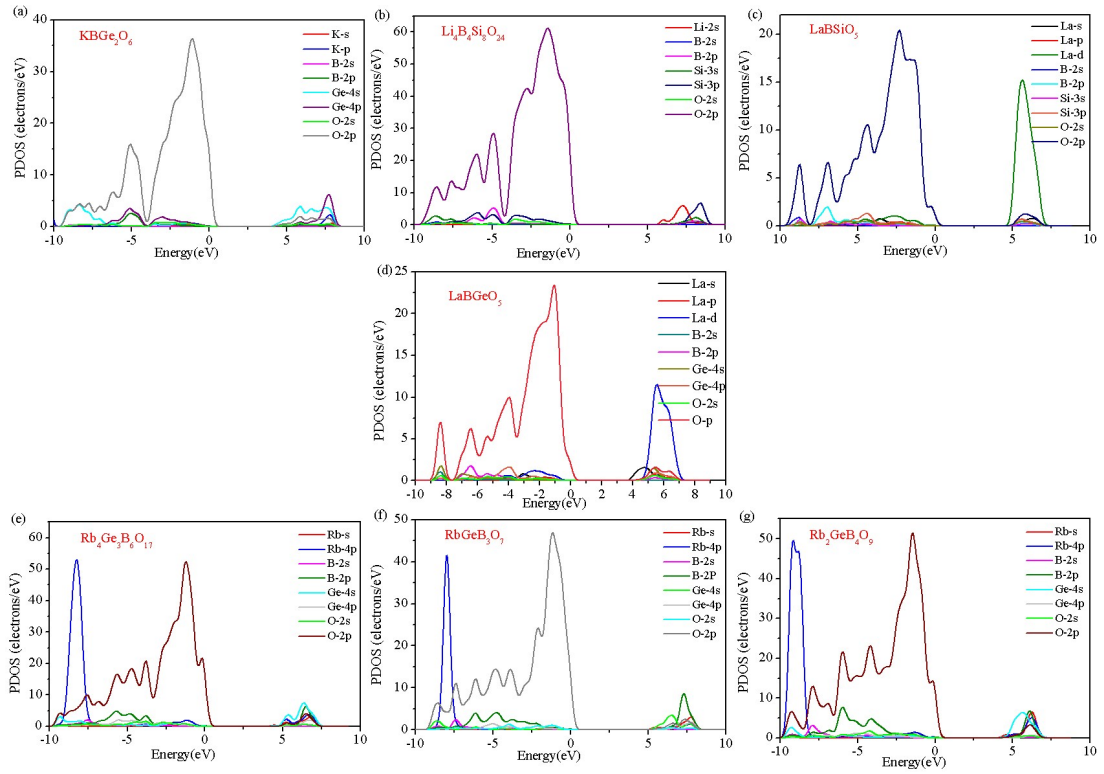

Figure S3. PDOS of  $\text{KGe}_2\text{O}_6$ ,  $\text{Li}_4\text{B}_4\text{Si}_8\text{O}_{24}$ ,  $\text{LaBSiO}_5$ ,  $\text{LaGeO}_5$ ,  $\text{Rb}_4\text{Ge}_3\text{B}_6\text{O}_{17}$ ,  $\text{RbGeB}_3\text{O}_7$  and  $\text{Rb}_2\text{GeB}_4\text{O}_9$ .
